# Supplementary material for: Occurrence and Molecular Variability of the Main Kiwifruit Viruses in the Sichuan Province of China
Source: MDPI journal article supplement (doi:10.3390/v14112460), 2022-11-06
Supplement: s1 [file s1]

## Supplementary Material

# Occurrence and Molecular Variability of the Main Kiwifruit Viruses in the Sichuan Province of China

Jing Shang <sup>1,\*</sup>, Qi Jia <sup>1,†</sup>, Lei Zhang <sup>1</sup>, Siqi Zhang <sup>1</sup>, Junbo Du <sup>1</sup>, Wenming Wang <sup>2</sup> and Jing Shui <sup>3</sup>

<sup>1</sup> College of Agronomy, Sichuan Agricultural University, Chengdu 611130, China

<sup>2</sup> State Key Laboratory of Crop Gene Exploration and Utilization in Southwest, Chengdu 611130, China

<sup>3</sup> Bureau of Agriculture and Rural Affairs, Luzhou 646000, China

\* Correspondence: shangjing\_edu@163.com; Tel.: +028-86290872

† These authors contributed equally to this work.

**Supplement Table S1.** All the primers used in this study.

| Name of Primers | Sequence (5'-3')             | Product Size (bp) | Use                      | Reference                               |
|-----------------|------------------------------|-------------------|--------------------------|-----------------------------------------|
| AcVA F          | CATGGCAAAGAATATCTCAAG        | 471               | Detection of AcVA        | Zhao et al.2018                         |
| AcVA R          | AGATCCAACCCAGAGTTGAAA        |                   |                          |                                         |
| AcVB5F          | GTTTGGCAGGAGACGTAGGGC        | 342               | Detection of AcVB        | Blouin et al.<br>2012 Zheng et al. 2015 |
| AcVB5R          | AGTTAAGTGCTCTYGGRGGTGTG      |                   |                          |                                         |
| AcCRaV3F        | ATCCAAGAATTCCTTAACAGCA       | 477               | Detection of AcCRaV      | Zheng et al. 2017                       |
| AcCRaV3R        | TGTGCAATCATGGCTTATCAGA       |                   |                          |                                         |
| ASGV-F          | CCCGCTGTTGGATTGATACACCTC     | 499               | Detection of ASGV        | James et al. 1997                       |
| ASGV-R          | GGAATTTACACGACTCCTAACCCTCC   |                   |                          |                                         |
| CTLV-AP         | CCTGAATTGAAAACCTTTGCTGCC     | 456               | Detection of CTLV        | Ito et al. 2002                         |
| CTLV-AM         | TAGAAAAACCACACTAACCCGGAAATC  |                   |                          |                                         |
| AMV F           | GCTGGTAAACCTACTAAAC          | 399               | Detection of AMV         | Zhao et al.2018                         |
| AMV R           | AAACCCGAACCTTCTCATT          |                   |                          |                                         |
| CMV F           | GGATGCTTCTCCRCGAGDT          | 870               | Detection of CMV         | This study                              |
| CMV R           | GCTGGATGGACAACCCGTTTC        |                   |                          |                                         |
| PVX F           | AGTGCGCGAGGTTTACCAATC        | 790               | Detection of PVX         | Zhao et al.2018                         |
| PVX R           | GTGGTTTGCCGCGAACGATTC        |                   |                          |                                         |
| CNV-F791        | CCTCGCAGAAGACCTTATGC         | 215               | Detection of CNV         | Blouin et al. 2013                      |
| CNV-R100        | GCCGACTCCTCCACTCCA           |                   |                          |                                         |
| 2               |                              |                   |                          |                                         |
| AcVA CPF        | TGCCTAGCGTGTATGAAGC          | 644               | CP gene clone for AcVA   | Zhao et al.2018                         |
| AcVA CPR        | CCGTGAGAAATGATGGGTC          |                   |                          |                                         |
| AcVB CPF        | CTTCCCTGGTTACTTTGTG          | 727               | CP gene clone for AcVB   | This study                              |
| AcVB CPR        | GTTTATTACAGCCTGTCTC          |                   |                          |                                         |
| AcCRaV CP-F     | CGAGCTCAGTGGGAAGAACCACAATATT | 945               | CP gene clone for AcCRaV | Zheng et al. 2017                       |

|         |                              |     |                   |                 |
|---------|------------------------------|-----|-------------------|-----------------|
| AcCRaV  | CGGGATCCATGCCAAAGCCTATGCAAGG |     |                   |                 |
| CP-R    |                              |     |                   |                 |
| CMV CPF | CTTTCTCATGGATGCTTCTC         | 885 | CP gene clone for | Felix and Clara |
| CMV CPR | GCCGTAAGCTGGATGGAC           |     | CMV               | 2008            |

**Supplement Table S2.** Isolates of *Actinidia* virus A (AcVA) with complete coat protein nucleotide sequences.

| Isolate   | Accession Number | Original Host       | Geographical Origin      | Sequence Reference |
|-----------|------------------|---------------------|--------------------------|--------------------|
| YJ1810.03 | MK900390         | Actinidia           | Yingjing, Sichuan, China | This study         |
| YJ145.23  | MK900391         | Actinidia           | Yingjing, Sichuan, China | This study         |
| YJ215.23  | MK900392         | Actinidia           | Yingjing, Sichuan, China | This study         |
| CX14      | MK900393         | Actinidia           | Cangxi, Sichuan, China   | This study         |
| PJ14      | MK900394         | Actinidia           | Pujiang, Sichuan, China  | This study         |
| QL32      | MK900395         | Actinidia           | Qionglai, Sichuan, China | This study         |
| QL29      | MK900396         | Actinidia           | Qionglai, Sichuan, China | This study         |
| QL18      | MK900397         | Actinidia           | Qionglai, Sichuan, China | This study         |
| QL6       | MK900398         | Actinidia           | Qionglai, Sichuan, China | This study         |
| CX17      | MK900399         | Actinidia           | Cangxi, Sichuan, China   | This study         |
| CX15      | MK900400         | Actinidia           | Cangxi, Sichuan, China   | This study         |
| CX9       | MK900401         | Actinidia           | Cangxi, Sichuan, China   | This study         |
| PJ35      | MK900402         | Actinidia           | Pujiang, Sichuan, China  | This study         |
| PJ31      | MK900403         | Actinidia           | Pujiang, Sichuan, China  | This study         |
| PJ26      | MK900404         | Actinidia           | Pujiang, Sichuan, China  | This study         |
| PJ24      | MK900405         | Actinidia           | Pujiang, Sichuan, China  | This study         |
| PJ22      | MK900406         | Actinidia           | Pujiang, Sichuan, China  | This study         |
| PJ17      | MK900407         | Actinidia           | Pujiang, Sichuan, China  | This study         |
| PJ16      | MK900408         | Actinidia           | Pujiang, Sichuan, China  | This study         |
| YJ25.23   | MK900409         | Actinidia           | Yingjing, Sichuan, China | This study         |
| YJ29      | MK900410         | Actinidia           | Yingjing, Sichuan, China | This study         |
| YJ32      | MK900411         | Actinidia           | Yingjing, Sichuan, China | This study         |
| p26       | MG977014         | grapevine           | Iran                     | Moradi 2016        |
| p25       | MG977013         | grapevine           | Iran                     | Moradi 2016        |
| P14       | LK937680         | Not stated          | Greece: Athens           | Unpublished        |
| common    | AY340582         | Not stated          | Sao Paulo State, Brazil  | Unpublished        |
| BR1       | AF438410         | Not stated          | Southern Brazil          | Nickel et al. 2001 |
| TP7-93A   | JN427014         | Actinidia sp.       | New Zealand              | Blouin et al. 2012 |
| Haenam    | KY613999         | Actinidia chinensis | South Korea              | Cho 2016           |
| TP7-93B   | JN427015         | Actinidia chinensis | New Zealand              | Blouin et al. 2012 |
| Haenam    | KY614000         | Actinidia chinensis | South Korea              | Cho 2016           |

**Supplement Table S3.** Isolates of *Actinidia* virus B (AcVB) with complete coat protein nucleotide sequences.

| Isolate | Accession Number | Original Host       | Geographical Origin        | Sequence Reference |
|---------|------------------|---------------------|----------------------------|--------------------|
| CX20    | MK900440         | Actinidia           | Cangxi, Sichuan, China     | This study         |
| DJY2    | MK900441         | Actinidia           | Dujiangyan, Sichuan, China | This study         |
| PJ16    | MK900442         | Actinidia           | Pujiang, Sichuan, China    | This study         |
| QL33    | MK900443         | Actinidia           | Qionglai, Sichuan, China   | This study         |
| CX10    | MK900444         | Actinidia           | Cangxi, Sichuan, China     | This study         |
| CX51    | MK900445         | Actinidia           | Cangxi, Sichuan, China     | This study         |
| DJY5    | MK900446         | Actinidia           | Dujiangyan, Sichuan, China | This study         |
| YJ20    | MK900447         | Actinidia           | Yingjing, Sichuan, China   | This study         |
| PJ17    | MK900448         | Actinidia           | Pujiang, Sichuan, China    | This study         |
| CX22    | MK900449         | Actinidia           | Cangxi, Sichuan, China     | This study         |
| PJ6     | MK900450         | Actinidia           | Pujiang, Sichuan, China    | This study         |
| PJ5     | MK900451         | Actinidia           | Pujiang, Sichuan, China    | This study         |
| QL19    | MK900452         | Actinidia           | Qionglai, Sichuan, China   | This study         |
| CX21    | MK900453         | Actinidia           | Cangxi, Sichuan, China     | This study         |
| QL29    | MK900454         | Actinidia           | Qionglai, Sichuan, China   | This study         |
| YJ25    | MK900455         | Actinidia           | Yingjing, Sichuan, China   | This study         |
| p26     | MG977014         | grapevine           | Iran                       | Moradi 2016        |
| p25     | MG977013         | grapevine           | Iran                       | Moradi 2016        |
| P14     | LK937680         | Not stated          | Greece: Athens             | Unpublished        |
| common  | AY340582         | Not stated          | Sao Paulo State, Brazil    | Unpublished        |
| BR1     | AF438410         | Not stated          | Southern Brazil            | Unpublished        |
| TP7-93A | JN427014         | Actinidia sp.       | New Zealand                | Blouin et al. 2012 |
| Haenam  | KY613999         | Actinidia chinensis | South Korea                | Cho 2016           |
| TP7-93B | JN427015         | Actinidia chinensis | New Zealand                | Blouin et al. 2012 |
| Haenam  | KY614000         | Actinidia chinensis | South Korea                | Cho 2016           |

**Supplement Table S4.** Isolates of *Actinidia* chlorotic ringspot-associated virus (AcCRaV) with complete coat protein nucleotide sequences.

| Isolate | Accession Number | Original Host | Geographical Origin      | Sequence Reference |
|---------|------------------|---------------|--------------------------|--------------------|
| QL3     | MK900412         | Actinidia     | Qionglai, Sichuan, China | This study         |
| QL5     | MK900413         | Actinidia     | Qionglai, Sichuan, China | This study         |
| QL7     | MK900414         | Actinidia     | Qionglai, Sichuan, China | This study         |
| QL13    | MK900415         | Actinidia     | Qionglai, Sichuan, China | This study         |
| QL16    | MK900416         | Actinidia     | Qionglai, Sichuan, China | This study         |
| QL17    | MK900417         | Actinidia     | Qionglai, Sichuan, China | This study         |
| QL22    | MK900418         | Actinidia     | Qionglai, Sichuan, China | This study         |
| QL43    | MK900419         | Actinidia     | Qionglai, Sichuan, China | This study         |

|        |           |                     |                            |                      |
|--------|-----------|---------------------|----------------------------|----------------------|
| CX4    | MK900420  | Actinidia           | Cangci, Sichuan, China     | This study           |
| PJ44   | MK900421  | Actinidia           | Pujiang, Sichuan, China    | This study           |
| PJ43   | MK900422  | Actinidia           | Pujiang, Sichuan, China    | This study           |
| PJ38   | MK900423  | Actinidia           | Pujiang, Sichuan, China    | This study           |
| PJ32   | MK900424  | Actinidia           | Pujiang, Sichuan, China    | This study           |
| PJ27   | MK900425  | Actinidia           | Pujiang, Sichuan, China    | This study           |
| PJ16   | MK900426  | Actinidia           | Pujiang, Sichuan, China    | This study           |
| PJ13   | MK900427  | Actinidia           | Pujiang, Sichuan, China    | This study           |
| PJ10   | MK900428  | Actinidia           | Pujiang, Sichuan, China    | This study           |
| CX37   | MK900429  | Actinidia           | Cangci, Sichuan, China     | This study           |
| CX33   | MK900430  | Actinidia           | Cangci, Sichuan, China     | This study           |
| CX30   | MK900431  | Actinidia           | Cangci, Sichuan, China     | This study           |
| CX18   | MK900432  | Actinidia           | Cangci, Sichuan, China     | This study           |
| CX15   | MK900433  | Actinidia           | Cangci, Sichuan, China     | This study           |
| CX13   | MK900434  | Actinidia           | Cangci, Sichuan, China     | This study           |
| CX9    | MK900435  | Actinidia           | Cangci, Sichuan, China     | This study           |
| CX6    | MK900436  | Actinidia           | Cangci, Sichuan, China     | This study           |
| ELC2   | MK900437  | Actinidia           | Dujiangyan, Sichuan, China | This study           |
| YJ29   | MK900438  | Actinidia           | Yingjing, Sichuan, China   | This study           |
| YJ7    | MK900439  | Actinidia           | Yingjing, Sichuan, China   | This study           |
| HN-6   | NC_038772 | Actinidia           | China                      | Unpublished          |
| Ris54  | EU885286  | Sorbus aucuparia L. | Finland                    | Kallinen et al. 2009 |
| Vih7   | EU885277  | Sorbus aucuparia L. | Finland                    | Kallinen et al. 2009 |
| Kuo12  | EU885281  | Sorbus aucuparia L. | Finland                    | Kallinen et al. 2009 |
| RYRSaV | NC_038854 | Cercis canadensis   | USA                        | Di Bello 2016        |

**Supplement Table S5.** Isolates of Cucumber mosaic virus (CMV) with complete coat protein nucleotide sequences.

| Isolate | Accession Number | Original Host | Geographical Origin      | Sequence Reference |
|---------|------------------|---------------|--------------------------|--------------------|
| QL21    | MK900360         | Actinidia     | Qionglai, Sichuan, China | This study         |
| QL26    | MK900361         | Actinidia     | Qionglai, Sichuan, China | This study         |
| QL29    | MK900362         | Actinidia     | Qionglai, Sichuan, China | This study         |
| QL31    | MK900363         | Actinidia     | Qionglai, Sichuan, China | This study         |
| QL33    | MK900364         | Actinidia     | Qionglai, Sichuan, China | This study         |
| QL36    | MK900365         | Actinidia     | Qionglai, Sichuan, China | This study         |
| QL37    | MK900366         | Actinidia     | Qionglai, Sichuan, China | This study         |
| QL43    | MK900367         | Actinidia     | Qionglai, Sichuan, China | This study         |
| QL44    | MK900368         | Actinidia     | Qionglai, Sichuan, China | This study         |
| PJ9     | MK900369         | Actinidia     | Pujiang, Si chuan, China | This study         |
| CX1     | MK900370         | Actinidia     | Cangxi, Sichuan, China   | This study         |
| CX3     | MK900371         | Actinidia     | Cangxi, Sichuan, China   | This study         |
| CX20    | MK900372         | Actinidia     | Cangxi, Sichuan, China   | This study         |

|            |          |                                     |                            |                      |
|------------|----------|-------------------------------------|----------------------------|----------------------|
| CX25       | MK900373 | Actinidia                           | Cangxi, Sichuan, China     | This study           |
| CX26       | MK900374 | Actinidia                           | Cangxi, Sichuan, China     | This study           |
| CX31       | MK900375 | Actinidia                           | Cangxi, Sichuan, China     | This study           |
| CX37       | MK900376 | Actinidia                           | Cangxi, Sichuan, China     | This study           |
| QL4        | MK900377 | Actinidia                           | Qionglai, Sichuan, China   | This study           |
| QL1        | MK900378 | Actinidia                           | Qionglai, Sichuan, China   | This study           |
| QL2        | MK900379 | Actinidia                           | Qionglai, Sichuan, China   | This study           |
| PJ26       | MK900380 | Actinidia                           | Pujiang, Sichuan, China    | This study           |
| PJ31       | MK900381 | Actinidia                           | Pujiang, Sichuan, China    | This study           |
| DJY6-0504  | MK900382 | Actinidia                           | Dujiangyan, Sichuan, China | This study           |
| DJY27-0504 | MK900383 | Actinidia                           | Dujiangyan, Sichuan, China | This study           |
| DJY18-0504 | MK900384 | Actinidia                           | Dujiangyan, Sichuan, China | This study           |
| DJY19-0504 | MK900385 | Actinidia                           | Dujiangyan, Sichuan, China | This study           |
| YJ14-10.03 | MK900386 | Actinidia                           | Yingjing, Sichuan, China   | This study           |
| DJY28-0504 | MK900387 | Actinidia                           | Dujiangyan, Sichuan, China | This study           |
| DJY8-0504  | MK900388 | Actinidia                           | Dujiangyan, Sichuan, China | This study           |
| PJ37       | MK900389 | Actinidia                           | Pujiang, Sichuan, China    | This study           |
| BAR92/1    | AJ829778 | Lycopersicon<br>esculentum (tomato) | Spain: Barcelona           | Bonnet et al. 2005   |
| TUR84      | LC066512 | Rapistrum rugosum                   | Turkey                     | Ohshima et al. 2016  |
| Li         | AB506797 | Lily                                | South Korea                | Unpublished          |
| Tfn        | Y16926   | tomato                              | Italy                      | Roossinck. 2002      |
| IRN-TIm1   | LC066479 | Impatiens balsamina                 | Iran                       | Ohshima 2016         |
| AR1        | KM823529 | Medicago sativa                     | Iran                       | Unpublished          |
| AK1        | KM823528 | Medicago sativa                     | Iran                       | Unpublished          |
| 3a         | D00668   | Not stated                          | Japan                      | Karasawa et al. 1991 |
| Lucknow    | AJ580841 | Chrysanthemum sp.                   | India: Lucknow             | Unpublished          |
| TAV-JS     | KP019203 | Chrysanthemum<br>morifolium Ramat.  | China: Wuxi Jiangsu        | Zhao et al. 2015     |
| Fny        | D10538   | Not stated                          |                            | Roossinck 2002       |
| SL         | KX013372 | Lycopersicon                        | USA                        | Unpublished          |
| YN         | EF216865 | esculentum                          | China                      | Unpublished          |
| CMV        | DQ249298 | Not stated                          | China                      | Unpublished          |
| Hnt        | KC407999 | tomato                              | China                      | Unpublished          |
| 3a         | AJ277268 | tobacco                             | Australia                  | Moreno et al. 1997   |
|            |          | Not stated                          |                            |                      |

**Supplement Table S6.** Genetic diversity of the CP genes in the different AcVA populations.

| Population | Sample Size | Haplotypes | Haplotype Diversity | Nucleotide Diversity |
|------------|-------------|------------|---------------------|----------------------|
| MX         | 10          | 9          | 0.978               | 0.08043              |
| ZZ         | 7           | 7          | 1.000               | 0.00511              |
| HZ         | 6           | 6          | 1.000               | 0.06678              |
| YL         | 5           | 5          | 1.000               | 0.07919              |

|     |   |   |       |         |
|-----|---|---|-------|---------|
| GY  | 4 | 4 | 1.000 | 0.08585 |
| PJ  | 8 | 7 | 0.964 | 0.07119 |
| QL  | 4 | 4 | 1.000 | 0.07383 |
| YA  | 6 | 5 | 0.933 | 0.07036 |
| DJY | - | - | -     | -       |

**Supplement Table S7.** Genetic diversity of the CP genes in the different AcVB populations.

| Population | Sample Size | Haplotypes | Haplotype Diversity | Nucleotide Diversity |
|------------|-------------|------------|---------------------|----------------------|
| MX         | 8           | 8          | 1.000               | 0.09404              |
| ZZ         | 5           | 4          | 0.900               | 0.00637              |
| HZ         | -           | -          | -                   | -                    |
| YL         | 3           | 3          | 1.000               | 0.00447              |
| GY         | 5           | 5          | 1.000               | 0.14238              |
| PJ         | 4           | 3          | 0.833               | 0.12619              |
| QL         | 3           | 2          | 0.667               | 0.11279              |
| YA         | 2           | 2          | 1.000               | 0.16415              |
| DJY        | 2           | 2          | 1.000               | 0.16583              |

**Supplement Table S8.** Genetic diversity of the CP genes in the different CMV populations.

| Population | Sample Size | Haplotypes | Haplotype Diversity | Nucleotide Diversity |
|------------|-------------|------------|---------------------|----------------------|
| MX         | 6           | 6          | 1.000               | 0.01009              |
| ZZ         | 4           | 4          | 1.000               | 0.00728              |
| HZ         | 3           | 3          | 1.000               | 0.00832              |
| YL         | 3           | 3          | 1.000               | 0.01248              |
| GY         | 7           | 3          | 0.524               | 0.00089              |
| PJ         | 4           | 3          | 0.833               | 0.00572              |
| QL         | 12          | 11         | 0.985               | 0.01132              |
| YA         | -           | -          | -                   | -                    |
| DJY        | 6           | 5          | 0.933               | 0.00374              |

**Supplement Table S9.** Genetic diversity of the CP genes in the different AcCRaV populations.

| Population | Sample Size | Haplotypes | Haplotype Diversity | Nucleotide Diversity |
|------------|-------------|------------|---------------------|----------------------|
| MX         | 10          | 8          | 0.978               | 0.04928              |
| ZZ         | 6           | 6          | 1.000               | 0.05239              |
| HZ         | 5           | 5          | 1.000               | 0.05011              |
| YL         | 4           | 4          | 1.000               | 0.04185              |
| GY         | 9           | 5          | 0.772               | 0.01755              |
| PJ         | 8           | 6          | 0.929               | 0.04041              |
| QL         | 8           | 5          | 0.893               | 0.03346              |
| YA         | 2           | 2          | 1.000               | 0.01522              |
| DJY        | -           | -          | -                   | -                    |

**Supplement Table S10.** Population differences in the CP gene of the AcVA populations.

| Population | K <sub>ST</sub> | P-Value <sup>a</sup> | S <sub>nn</sub> | P-Value  | F <sub>ST</sub> | N <sub>m</sub> |
|------------|-----------------|----------------------|-----------------|----------|-----------------|----------------|
| YA–QL      | 0.14328         | 0.0240*              | 1.00000         | 0.0300*  | 0.23784         | 1.60           |
| YA–PJ      | 0.20884         | 0.0060**             | 0.85714         | 0.0060** | 0.33392         | 1.00           |
| YA–GY      | 0.13024         | 0.0400*              | 0.80000         | 0.0240*  | 0.21564         | 1.82           |
| YA–MX      | 0.14290         | 0.0080**             | 0.93750         | 0.0020** | 0.25319         | 1.47           |
| YA–HZ      | 0.22181         | 0.0040**             | 1.00000         | 0.0030** | 0.34321         | 0.96           |

|       |         |           |         |           |         |      |
|-------|---------|-----------|---------|-----------|---------|------|
| YA–ZZ | 0.51764 | 0.0000*** | 1.00000 | 0.0000*** | 0.65041 | 0.27 |
| YA–YL | 0.18869 | 0.11741*  | 0.81818 | 0.2757ns  | 0.29779 | 1.18 |
| PJ–QL | 0.13170 | 0.10094*  | 0.83333 | 0.2851ns  | 0.23757 | 1.60 |
| PJ–GY | 0.06629 | 0.0760*   | 0.75000 | 0.0460*   | 0.12429 | 3.52 |
| PJ–MX | 0.22861 | 0.0000*** | 0.94444 | 0.0000*** | 0.36331 | 0.88 |
| PJ–HZ | 0.27102 | 0.0010**  | 1.00000 | 0.0000*** | 0.41475 | 0.71 |
| PJ–ZZ | 0.50641 | 0.0000*** | 1.00000 | 0.0000*** | 0.67050 | 0.25 |
| PJ–YL | 0.20884 | 0.0050**  | 0.84615 | 0.0040**  | 0.33392 | 1.00 |

**Supplement Table S11.** Population differences in the CP genes of AcVB populations.

| Population | K <sub>ST</sub> | P-Value <sup>a</sup> | Snn     | P-Value  | F <sub>ST</sub> | Nm   |
|------------|-----------------|----------------------|---------|----------|-----------------|------|
| YA–ZZ      | 0.34518         | 0.0580ns             | 0.85714 | 0.0580ns | 0.40047         | 0.75 |
| YA–YL      | 0.33115         | 0.1140ns             | 0.80000 | 0.1140ns | 0.40079         | 0.75 |
| PJ–MX      | 0.07556         | 0.1860ns             | 0.79167 | 0.0460*  | 0.13824         | 3.12 |
| PJ–ZZ      | 0.41169         | 0.0060**             | 1.00000 | 0.0060** | 0.53120         | 0.44 |
| DJY–ZZ     | 0.33639         | 0.0410*              | 0.85714 | 0.0410*  | 0.39100         | 0.78 |
| GY–MX      | 0.10028         | 0.0880ns             | 0.76923 | 0.0270*  | 0.17304         | 2.39 |
| GY–ZZ      | 0.40074         | 0.0070**             | 1.00000 | 0.0060** | 0.54621         | 0.42 |
| GY–YL      | 0.34416         | 0.0410*              | 1.00000 | 0.0380*  | 0.54715         | 0.41 |
| MX–ZZ      | 0.08566         | 0.1200ns             | 0.65385 | 0.1360ns | 0.17999         | 2.28 |
| ZZ–YL      | 0.34518         | 0.0610ns             | 0.85714 | 0.0610ns | 0.40047         | 0.75 |

**Supplement Table S12.** Differences in the CP genes of CMV populations.

| Population | K <sub>ST</sub> | P-Value <sup>a</sup> | Snn     | P-Value   | F <sub>ST</sub> | Nm   |
|------------|-----------------|----------------------|---------|-----------|-----------------|------|
| PJ–QL      | 0.03760         | 0.0370*              | 0.87500 | 0.2680ns  | 0.10212         | 4.40 |
| PJ–DJY     | 0.17215         | 0.0070**             | 1.00000 | 0.0030*   | 0.27200         | 1.34 |
| PJ–GY      | 0.52381         | 0.0040**             | 1.00000 | 0.0040**  | 0.63374         | 0.29 |
| PJ–MX      | 0.08517         | 0.0300*              | 0.85000 | 0.1290ns  | 0.15556         | 2.71 |
| PJ–HZ      | 0.32353         | 0.0240*              | 1.00000 | 0.0230*   | 0.44898         | 0.61 |
| PJ–ZZ      | 0.39863         | 0.0390*              | 1.00000 | 0.0220*   | 0.53704         | 0.43 |
| PJ–YL      | 0.27500         | 0.0350*              | 1.00000 | 0.0300*   | 0.38596         | 0.80 |
| DJY–GY     | 0.56535         | 0.0010**             | 1.00000 | 0.0010**  | 0.69709         | 0.22 |
| DJY–MX     | 0.08276         | 0.0100*              | 0.79167 | 0.0050**  | 0.14194         | 3.02 |
| DJY–HZ     | 0.31685         | 0.0130*              | 0.96296 | 0.0020**  | 0.44762         | 0.62 |
| DJY–ZZ     | 0.40952         | 0.0020**             | 1.00000 | 0.0010**  | 0.54894         | 0.41 |
| DJY–YL     | 0.26857         | 0.0120*              | 0.77778 | 0.0000*** | 0.37600         | 0.83 |
| GY–MX      | 0.29836         | 0.0010**             | 1.00000 | 0.0000*** | 0.42490         | 0.68 |
| GY–HZ      | 0.58333         | 0.0100*              | 1.00000 | 0.0100*   | 0.67021         | 0.25 |
| GY–ZZ      | 0.63907         | 0.0010**             | 1.00000 | 0.0010**  | 0.73236         | 0.18 |
| GY–YL      | 0.50000         | 0.0110*              | 1.00000 | 0.0110*   | 0.58333         | 0.36 |
| MX–HZ      | 0.20866         | 0.0130*              | 1.00000 | 0.0210*   | 0.35244         | 0.92 |
| MX–ZZ      | 0.29151         | 0.0010**             | 1.00000 | 0.0010**  | 0.44333         | 0.63 |
| MX–YL      | 0.18442         | 0.0070**             | 0.88889 | 0.0060**  | 0.30374         | 1.15 |
| HZ–ZZ      | 0.11864         | 0.3530ns             | 0.85714 | 0.0780ns  | 0.18919         | 2.14 |
| ZZ–YL      | 0.09859         | 0.059ns              | 0.71429 | 0.0260*   | 0.15556         | 2.71 |

**Supplement Table S13.** Differences in the CP gene of AcCRaV populations.

| Population | K <sub>ST</sub> | P-Value <sup>a</sup> | Snn     | P-Value   | F <sub>ST</sub> | Nm   |
|------------|-----------------|----------------------|---------|-----------|-----------------|------|
| YA–QL      | 0.13201         | 0.0730ns             | 1.00000 | 0.176     | 0.34380         | 0.95 |
| YA–PJ      | 0.07723         | 0.1650ns             | 0.80000 | 0.4920ns  | 0.23040         | 1.67 |
| YA–GY      | 0.10344         | 0.095ns              | 0.17600 | 0.2250ns  | 0.25831         | 1.44 |
| YA–MX      | 0.12917         | 0.0340*              | 1.00000 | 0.2420*   | 0.39824         | 0.76 |
| YA–HZ      | 0.23971         | 0.0390*              | 0.85714 | 0.3720ns  | 0.44862         | 0.61 |
| YA–ZZ      | 0.17087         | 0.0430*              | 1.00000 | 0.4830ns  | 0.38007         | 0.82 |
| YA–YL      | 0.30215         | 0.0730ns             | 1.00000 | 0.0830ns  | 0.48403         | 0.53 |
| PJ–GY      | 0.08494         | 0.0350*              | 0.68750 | 0.0100*   | 0.14824         | 2.87 |
| PJ–MX      | 0.06361         | 0.0030*              | 0.85185 | 0.0000*** | 0.11610         | 3.81 |
| PJ–HZ      | 0.07946         | 0.0250*              | 0.69231 | 0.0190*   | 0.14102         | 3.05 |
| PJ–ZZ      | 0.05687         | 0.0330*              | 0.78571 | 0.0280*   | 0.10088         | 4.46 |
| PJ–YL      | 0.10399         | 0.0260*              | 0.83333 | 0.0260*   | 0.19222         | 2.10 |
| GY–MX      | 0.18409         | 0.0000***            | 1.00000 | 0.0000*** | 0.31145         | 1.11 |
| GY–HZ      | 0.22158         | 0.0010**             | 0.92308 | 0.0010**  | 0.33271         | 1.00 |
| GY–ZZ      | 0.17902         | 0.0020**             | 0.94286 | 0.0020**  | 0.27866         | 1.29 |
| GY–YL      | 0.26050         | 0.0000***            | 0.95833 | 0.0000*** | 0.38952         | 0.78 |

**Supplement Table S14.** Selective pressure on different groups of the four viruses.

| Region | AcVA  |       |       | AcVB  |       |       | CMV   |       |       | AcCRaV |       |       |
|--------|-------|-------|-------|-------|-------|-------|-------|-------|-------|--------|-------|-------|
|        | dS    | dN    | dN/dS | ds    | dN    | dN/ds | ds    | dN    | dN/ds | ds     | dN    | dN/ds |
| MX     | 0.410 | 0.019 | 0.046 | 0.035 | 0.138 | 3.943 | 0.008 | 0.011 | 1.375 | 0.087  | 0.039 | 0.448 |
| ZZ     | 0.006 | 0.005 | 0.833 | 0.011 | 0.006 | 0.545 | 0.008 | 0.007 | 0.875 | 0.096  | 0.039 | 0.406 |
| HZ     | 0.347 | 0.013 | 0.037 | -     | -     | -     | 0.009 | 0.007 | 0.778 | 0.090  | 0.040 | 0.444 |
| YL     | 0.412 | 0.015 | 0.036 | 0.005 | 0.005 | 1.000 | 0.005 | 0.016 | 3.200 | 0.050  | 0.036 | 0.720 |
| GY     | 0.511 | 0.006 | 0.012 | 0.060 | 0.179 | 2.983 | 0.000 | 0.001 | -     | 0.025  | 0.012 | 0.480 |
| PJ     | 0.454 | 0.005 | 0.011 | 0.058 | 0.177 | 3.052 | 0.000 | 0.007 | -     | 0.069  | 0.031 | 0.449 |
| QL     | 0.402 | 0.006 | 0.015 | 0.054 | 0.160 | 2.963 | 0.007 | 0.018 | 2.571 | 0.026  | 0.055 | 2.115 |
| CD     | -     | -     | -     | -     | -     | -     | -     | -     | -     | 0.089  | 0.044 | 0.494 |

**Supplement Table S15.** Neutrality tests for CP genes in different AcVA populations.

| Region | Tajima's D | Fu & Li's D | Fu & Li's F |
|--------|------------|-------------|-------------|
| MX     | 0.50894    | -0.02373    | 0.12402     |
| ZZ     | -1.35933   | -1.3784     | -1.50632    |
| HZ     | 1.06435    | 1.40968     | 1.46693     |
| YL     | -0.61584   | -0.49741    | -0.5667     |
| GY     | -0.25204   | -0.19373    | -0.25785    |
| PJ     | 0.22397    | 0.39466     | 0.39605     |
| QL     | -0.043     | 0.15409     | 0.12643     |
| YA     | -          | -           | -           |
| DJY    | 0.64902    | 0.79476     | 0.83878     |
| total  | 0.08604    | -0.14411    | -0.06809    |



**Supplement Table S16.** Neutrality tests for CP genes in different AcVB populations.

| Region | Tajima's D | Fu & Li's D | Fu & Li's F |
|--------|------------|-------------|-------------|
| MX     | 0.177      | 0.73052     | 0.67104     |
| ZZ     | -0.07339   | -0.07339    | -0.07686    |
| HZ     | -          | -           | -           |
| YL     | -          | -           | -           |
| GY     | -0.0526    | 0.24935     | 0.20576     |
| PJ     | 0.65354    | 0.8505      | 0.87464     |
| QL     | -          | -           | -           |
| YA     | -          | -           | -           |
| DJY    | -          | -           | -           |
| total  | 0.65404    | 0.72138     | 0.82091     |

**Supplement Table S17.** Neutrality tests for CP genes in different CMV populations.

| Region | Tajima's D | Fu & Li's D | Fu & Li's F |
|--------|------------|-------------|-------------|
| MX     | -0.35152   | -0.26995    | -0.32825    |
| ZZ     | -0.27814   | -0.21996    | -0.25542    |
| HZ     | 0.42856    | -0.43664    | -0.49151    |
| YL     | -0.20544   | -0.07251    | -0.10321    |
| GY     | -0.70623   | -0.14619    | -0.3167     |
| PJ     | -0.26274   | 0.0294      | 0.01631     |
| QL     | -0.01201   | 0.29492     | 0.24895     |
| YA     | -          | -           | -           |
| DJY    | -          | -           | -           |
| total  | -2.30350   | -3.84244    | -3.91410    |

**Supplement Table S18.** Neutrality tests for CP genes in different AcCRaV populations.

| Region | Tajima's D | Fu & Li's D | Fu & Li's F |
|--------|------------|-------------|-------------|
| MX     | -0.81528   | -0.76608    | -0.84473    |
| ZZ     | -0.49151   | -0.49151    | -0.48796    |
| HZ     | -          | -           | -           |
| YL     | -          | -           | -           |
| GY     | -1.23716   | -1.29591    | -1.37408    |
| PJ     | 1.16799    | 1.16799     | 1.12267     |
| QL     | -1.42187   | -1.30929    | -1.52538    |
| YA     | -          | -           | -           |
| DJY    | -0.49605   | -0.41639    | -0.46347    |
| total  | -0.28834   | -0.01985    | -0.14687    |

**Supplement Table S19.** Isolates of AcCRaV with RNA3 nucleotide sequences used for analysis.

| Isolate | Accession Number | Original Host | Geographical Origin      | Sequence Reference |
|---------|------------------|---------------|--------------------------|--------------------|
| QL3     | MZ052112         | Actinidia     | Qionglai, Sichuan, China | This study         |
| QL1     | MZ052111         | Actinidia     | Qionglai, Sichuan, China | This study         |
| QL6     | MZ052113         | Actinidia     | Qionglai, Sichuan, China | This study         |

|      |           |           |                          |             |
|------|-----------|-----------|--------------------------|-------------|
| QL7  | MZ052114  | Actinidia | Qionglai, Sichuan, China | This study  |
| QL14 | MZ052115  | Actinidia | Qionglai, Sichuan, China | This study  |
| QL16 | MZ052116  | Actinidia | Qionglai, Sichuan, China | This study  |
| QL21 | MZ052117  | Actinidia | Qionglai, Sichuan, China | This study  |
| QL25 | MZ052118  | Actinidia | Qionglai, Sichuan, China | This study  |
| QL35 | MZ052119  | Actinidia | Qionglai, Sichuan, China | This study  |
| QL37 | MZ052120  | Actinidia | Qionglai, Sichuan, China | This study  |
| QL39 | MZ052121  | Actinidia | Qionglai, Sichuan, China | This study  |
| QL41 | MZ052097  | Actinidia | Qionglai, Sichuan, China | This study  |
| QL43 | MW717591  | Actinidia | Qionglai, Sichuan, China | This study  |
| PJ3  | MZ052102  | Actinidia | Pujiang, Sichuan, China  | This study  |
| PJ29 | MZ052105  | Actinidia | Pujiang, Sichuan, China  | This study  |
| PJ38 | MZ052106  | Actinidia | Pujiang, Sichuan, China  | This study  |
| PJ39 | MZ052107  | Actinidia | Pujiang, Sichuan, China  | This study  |
| PJ41 | MZ052108  | Actinidia | Pujiang, Sichuan, China  | This study  |
| PJ43 | MW717591  | Actinidia | Pujiang, Sichuan, China  | This study  |
| PJ44 | MZ052110  | Actinidia | Pujiang, Sichuan, China  | This study  |
| PJ13 | MZ052104  | Actinidia | Pujiang, Sichuan, China  | This study  |
| PJ10 | MZ052103  | Actinidia | Pujiang, Sichuan, China  | This study  |
| CX16 | MZ052096  | Actinidia | Cangci, Sichuan, China   | This study  |
| CX32 | MZ052125  | Actinidia | Cangci, Sichuan, China   | This study  |
| CX55 | MZ052126  | Actinidia | Cangci, Sichuan, China   | This study  |
| HN-6 | NC_038772 | Actinidia | China                    | Unpublished |

## References

- Blouin, A.G., Pearson, M.N., Chavan, R.R., Woo, E.N.Y., Lebas, B.S.M., Veerakone, S., Ratti, C., Bicchieri, R., MacDiarmid, R.M., Cohen, D. 2012. Viruses of Kiwifruit (*Actinidia* Species). *J. Plant Pathol.* 99:221-235.
- Bonnet, J., Fraile, A., Sacristán, S., Malpica, J. M., García-Arenal, F. 2005. Role of recombination in the evolution of natural populations of cucumber mosaic virus, a tripartite RNA plant virus. *Virology.* 332:359-368.
- Cho, S.Y., Kim, H., Yi, S.I. 2017. First Report of Actinidia virus A and B Infecting *Actinidia chinensis* in South Korea. *Plant Dis.* In press.
- Di, Bello, P.L., Laney, A.G., Druciarek, T., Ho, T., Gergerich, R.C., Keller, K.E., Martin, R.R. and Tzanetakis, I. E. 2016. A novel emaravirus is associated with redbud yellow ringspot disease. *Virus Res.* 222:41-47.
- Kallinen, A.K., Lindberg, I.L., Tugume, A.K., Valkonen, J.P.T. 2009. Detection, distribution, and genetic variability of european mountain ash ringspot-associated virus. *Phytopathology.* 99:344-352.
- Karasawa, A. 1991. Nucleotide sequence of rna 3 of peanut stunt cucumovirus. *Virology.* 185.
- Moradi, R., Koolivand, D., Eini, O., Hajizadeh, M. 2017. Phylogenetic analysis of two Iranian Grapevine virus A isolates using coat protein gene sequence. *Iran J Genet Plant Breed.* 6:48-57.
- Moreno, I.M., Bernal, J.J., Garcia de Blas, B., Rodriguez-Cerezo, E. Garcia-Arenal, F. 1997. The expression level of the 3a movement protein determines differences in severity of symptoms between two strains of tomato aspermy cucumovirus. *Mol. Plant Microbe Interact.* 10: 171-179.

- Ohshima, K., Matsumoto, K., Yasaka, R., Nishiyama, M., Takeshita, M. 2016. Temporal analysis of reassortment and molecular evolution of cucumber mosaic virus: extra clues from its segmented genome. *Virology*. 487:188-197.
- Roossinck, M.J. 2002. Evolutionary history of Cucumber mosaic virus deduced by phylogenetic analyses. *J. Virol.* 76:3382-3387.
- Zhao, X.T., Liu, X.X., Hong, B. 2015. Characterization of tomato aspermy virus isolated from chrysanthemum and elucidation of its complete nucleotide sequence. *Acta Virol.* 59:204-206.
